# Supplementary material for: Twelve years of profile soil moisture and temperature measurements in Twente, the Netherlands
Source: Copernicus journal article supplement (doi:10.5194/essd-15-1889-2023), 2023-04-27
Supplement: Supplementary file 1 [file essd-15-1889-2023-supplement.pdf]

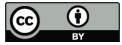

*Supplement of*

## **Twelve years of profile soil moisture and temperature measurements in Twente, the Netherlands**

**Rogier van der Velde et al.**

*Correspondence to:* Rogier van der Velde (rogier.vandervelde@vitens.nl)

The copyright of individual parts of the supplement might differ from the article licence.

## List of Tables

**Table S1: Identification numbers, geographic and map projected coordinates of the DINOLOket groundwater monitoring wells nearest to the monitoring station of the Twente network.**

5 **Table S2: Soil, land use and maintenance characteristics of the stations. The soil descriptions are from BOFEK2020 (Heinen et al., 2021). The land uses for 2009 – 2020 apply to adjacent fields and are from the crop parcel registry (Ministry of Economic Affairs and Climate Policy, 2021). Table classification: green stands for grass, orange stands for maize, red stands for potato, yellow stands for cereal, purple stands for other crops, brown stands for forest. Relocations of stations are noted by letters, which correspond to the locations in Fig. 1. Other maintenance practices are noted by asterisks and are specified in supplement Table S3.**

10 **Table S3: Type (EC-TM and 5TM), firmware and installation depth of decagon soil moisture probes at the monitoring stations of the Twente network.**

**Table S4: Change to instrumentation and measurement setups in the Twente monitoring network ordered by station.**

**Table S1: Identification numbers, geographic and map projected coordinates of the DINOloket groundwater monitoring wells nearest to the soil moisture monitoring station.**

| <i>Well ID</i> | <i>SM-site</i> | <i>Geographic (datum: WGS84)</i> |                            | <i>Amersfoort/RD (New)</i> |              | <i>Distance to SM-site (m)</i> |
|----------------|----------------|----------------------------------|----------------------------|----------------------------|--------------|--------------------------------|
|                |                | <i>Latitude (degrees)</i>        | <i>Longitude (degrees)</i> | <i>x (m)</i>               | <i>y (m)</i> |                                |
| B29A0230       | ITC_SM01       | 52.42101                         | 6.9698                     | 262652                     | 493754       | 735                            |
| B28F0163       | ITC_SM02       | 52.40017                         | 6.85354                    | 254791                     | 491269       | 1131                           |
| B28H0680       | ITC_SM03       | 52.35464                         | 6.82868                    | 253200                     | 486170       | 2695                           |
| B29C0147       | ITC_SM04       | 52.26337                         | 6.94898                    | 261614                     | 476187       | 2106                           |
| B28G0409       | ITC_SM05       | 52.28654                         | 6.65395                    | 241430                     | 478371       | 3404                           |
| B28E0166       | ITC_SM06       | 52.39649                         | 6.65903                    | 241562                     | 490610       | 1724                           |
| B29C0291       | ITC_SM07       | 52.36399                         | 6.96889                    | 262728                     | 487410       | 1008                           |
| B34G0251       | ITC_SM08       | 52.13267                         | 6.75563                    | 248690                     | 461380       | 808                            |
| B34F1353       | ITC_SM09       | 52.14655                         | 6.85044                    | 255150                     | 463050       | 506                            |
| B34E0313       | ITC_SM10       | 52.17773                         | 6.68185                    | 243550                     | 466300       | 2405                           |
| B34E0290       | ITC_SM10       | 52.17600                         | 6.65143                    | 241473                     | 466071       | 2506                           |
| B34B0289       | ITC_SM11       | 52.21861                         | 6.54436                    | 234074                     | 470689       | 1203                           |
| B34B0348       | ITC_SM11       | 52.22629                         | 6.54834                    | 234332                     | 471548       | 857                            |
| B34D0266       | ITC_SM12       | 52.13509                         | 6.56536                    | 235660                     | 461420       | 696                            |
| B34A1006       | ITC_SM13       | 52.18330                         | 6.41403                    | 225224                     | 466627       | 1201                           |
| B34A0846       | ITC_SM13       | 52.20495                         | 6.41074                    | 224965                     | 469032       | 1314                           |
| B33F0166       | ITC_SM14       | 52.18761                         | 6.30936                    | 217970                     | 469280       | 1613                           |
| B28D0329       | ITC_SM15       | 52.31243                         | 6.60179                    | 237823                     | 481191       | 721                            |
| B28D0463       | ITC_SM15       | 52.31243                         | 6.60179                    | 237823                     | 481191       | 721                            |
| B28D0335       | ITC_SM16       | 52.36833                         | 6.54119                    | 233592                     | 487342       | 409                            |
| B28B0240       | ITC_SM17       | 52.41524                         | 6.53591                    | 233150                     | 492556       | 602                            |
| B28A0064       | ITC_SM18       | 52.41251                         | 6.39916                    | 223851                     | 492113       | 1537                           |
| B27H0220       | ITC_SM19       | 52.33737                         | 6.29663                    | 216980                     | 483660       | 2430                           |
| B27H0419       | ITC_SM19       | 52.33737                         | 6.29663                    | 216980                     | 483660       | 2430                           |
| B28C0193       | ITC_SM20       | 52.32577                         | 6.44809                    | 227321                     | 482510       | 766                            |
| B34G0363       | Hupsel         | 52.06742                         | 6.65474                    | 241910                     | 453995       | 139                            |
| B28H0694       | Twenthe        | 52.26223                         | 6.88298                    | 257111                     | 475965       | 1335                           |

**Table S2: Soil, land use and maintenance characteristics of the stations. The soil descriptions are from BOFEK2020 (Heinen et al., 2021). The land uses for 2009 – 2020 apply to adjacent fields and are from the crop parcel registry (Ministry of Economic Affairs and Climate Policy, 2021). Table classification: green stands for grass, orange stands for maize, red stands for potato, yellow stands for cereal, purple stands for other crops, brown stands for forest. Relocations of stations are noted by letters, which correspond to the locations in Fig. 1. Other maintenance practices are noted by asterisks and are specified in supplement Table S4.**

| Station  | Texture class  | Soil description translated from Dutch (BOFEK2020 classification code)                   | Missing data | 2009 | 2010 | 2011 | 2012 | 2013 | 2014 | 2015 | 2016 | 2017 | 2018 | 2019 | 2020 |
|----------|----------------|------------------------------------------------------------------------------------------|--------------|------|------|------|------|------|------|------|------|------|------|------|------|
| ITC_SM01 | Sandy          | Highly loamy sandy soil with clay cover (3002)                                           | 12.8 %       | a    |      |      |      |      | *    | b    |      |      |      |      |      |
| ITC_SM02 | Sandy          | Highly loamy soil with man-made thick earth (3005)                                       | 9.2 %        | a    |      |      |      | b    |      | *    | *    | **   |      |      |      |
| ITC_SM03 | Sandy          | Highly loamy sand with clay cover (3002)                                                 | 11.5 %       | a    |      |      |      |      | *    |      |      | b    |      |      |      |
| ITC_SM04 | Loamy          | Tertiary clay (5003)                                                                     | 11.3 %       | a    |      |      |      |      |      |      | b*   |      |      | *    |      |
| ITC_SM05 | Sandy          | Highly loamy soil with man-made thick earth (3005)                                       | 8.3 %        | a    |      |      |      |      |      |      | *    | b    | c    |      |      |
| ITC_SM06 | Partly organic | Sandy cover on partly organic soil (2001)                                                | 27.4 %       | a    |      |      |      | *    |      | *    | b    |      |      |      |      |
| ITC_SM07 | Sandy          | Highly loamy sand with clay cover (3002)                                                 | 4.0 %        | a    |      |      |      |      | *    | b    |      |      |      |      |      |
| ITC_SM08 | Sandy          | Weakly loamy sand (3015)                                                                 | 7.0 %        |      | *    |      |      |      |      |      | *    |      |      |      |      |
| ITC_SM09 | Sandy          | Weakly loamy soil with man-made thick earth (3012)                                       | 8.8 %        |      |      |      |      | **   |      | *    |      |      | *    |      |      |
| ITC_SM10 | Sandy          | a & b: Highly loamy sand (3004)<br>c: Highly loamy sand (3021)                           | 20.6 %       | a    |      |      |      | *    | b    |      | c*   |      |      |      |      |
| ITC_SM11 | Sandy          | a & b: Weakly loamy soil with man-made thick earth (3012)<br>c: Highly loamy sand (3004) | 17.4 %       | a    |      |      | *    |      |      | b*   | c*   |      |      |      |      |
| ITC_SM12 | Clayey         | Clay on sand (4022)                                                                      | 13.9 %       |      |      |      |      | *    |      | *    | *    |      |      |      |      |
| ITC_SM13 | Sandy          | Weakly loamy sand (3015)                                                                 | 2.6 %        |      |      |      |      |      | *    |      | *    | *    |      |      |      |
| ITC_SM14 | Sandy          | Highly loamy sand (3021)                                                                 | 24.7 %       | a    | *    | b    |      | *    | *    |      | c    | *    |      |      |      |
| ITC_SM15 | Sandy          | Highly loamy sand with clay cover (3002)                                                 | 15.6 %       | a    |      |      |      |      |      |      | b*   |      |      | *    |      |

|                 |                |                                           |        |   |  |   |   |  |   |   |   |   |   |   |   |
|-----------------|----------------|-------------------------------------------|--------|---|--|---|---|--|---|---|---|---|---|---|---|
| ITC_SM16        | Partly organic | Sandy cover on partly organic soil (2001) | 30.6 % |   |  | * | * |  | * |   |   | * | * |   |   |
| ITC_SM17        | Sandy          | Weakly loamy sand (3015)                  | 25.5 % | a |  | b |   |  | * |   | c |   |   |   |   |
| ITC_SM18        | Sandy          | Highly loamy sand (3021)                  | 10.1 % |   |  |   |   |  | * | * |   |   |   |   | * |
| ITC_SM19        | Sandy          | Highly loamy sand (3004)                  | 9.3 %  |   |  |   |   |  | * |   |   |   |   |   |   |
| ITC_SM20        | Sandy          | Coarse sandy sand (3003)                  | 14.4 % |   |  |   |   |  | * |   |   |   |   |   |   |
| Hupsel          | Sandy          | Highly loamy sand (3004)                  | 0.0 %  |   |  |   |   |  |   |   |   |   |   |   |   |
| Twenthe airport | Sandy          | Weakly loamy sand (3014)                  | 12.9 % |   |  |   |   |  |   |   |   |   | * | * |   |

**Table S3: Type (EC-TM and 5TM), firmware and installation depth of decagon soil moisture probes at the monitoring stations of the Twente network.**

| Station  | Depth (cm) | Probe |      |      |      |      |                      |      |                  |      |      |              |      |  |
|----------|------------|-------|------|------|------|------|----------------------|------|------------------|------|------|--------------|------|--|
|          |            | 2009  | 2010 | 2011 | 2012 | 2013 | 2014                 | 2015 | 2016             | 2017 | 2018 | 2019         | 2020 |  |
| ITC_SM01 | 5          | EC-TM |      |      |      |      | 5TM 2013 calibration |      |                  |      |      |              |      |  |
|          | 10         | EC-TM |      |      |      |      | 5TM 2013 calibration |      |                  |      |      |              |      |  |
|          | 20         | EC-TM |      |      |      |      | 5TM 2013 calibration |      |                  |      |      |              |      |  |
|          | 40         | EC-TM |      |      |      |      | 5TM 2013 calibration |      |                  |      |      |              |      |  |
| ITC_SM02 | 5          |       |      |      |      |      |                      |      |                  |      |      |              |      |  |
|          | 10         |       |      |      |      |      |                      |      | 5TM firmware 4.0 |      |      |              |      |  |
|          | 20         |       |      |      |      |      |                      |      |                  |      |      |              |      |  |
|          | 40         |       |      |      |      |      |                      |      |                  |      |      |              |      |  |
| ITC_SM03 | 5          |       |      |      |      |      |                      |      |                  |      |      |              |      |  |
|          | 10         |       |      |      |      |      |                      |      |                  |      |      |              |      |  |
|          | 20         |       |      |      |      |      |                      |      |                  |      |      |              |      |  |
|          | 40         |       |      |      |      |      |                      |      |                  |      |      |              |      |  |
|          | 80         |       |      |      |      |      |                      |      |                  |      |      |              |      |  |
| ITC_SM04 | 5          |       |      |      |      |      |                      |      |                  |      |      |              |      |  |
|          | 10         |       |      |      |      |      |                      |      |                  |      |      |              |      |  |
|          | 20         |       |      |      |      |      |                      |      |                  |      |      |              |      |  |
| ITC_SM05 | 5          |       |      |      |      |      |                      |      |                  |      |      |              |      |  |
|          | 10         |       |      |      |      |      |                      |      |                  |      |      |              |      |  |
|          | 20         |       |      |      |      |      |                      |      |                  |      |      |              |      |  |
|          | 40         |       |      |      |      |      |                      |      |                  |      |      |              |      |  |
|          | 80         |       |      |      |      |      |                      |      |                  |      |      |              |      |  |
| ITC_SM06 | 5          |       |      |      |      |      |                      |      |                  |      |      | Discontinued |      |  |
|          | 10         |       |      |      |      |      |                      |      |                  |      |      | Discontinued |      |  |
|          | 20         |       |      |      |      |      |                      |      |                  |      |      | Discontinued |      |  |
|          | 40         |       |      |      |      |      |                      |      |                  |      |      | Discontinued |      |  |
|          | 80         |       |      |      |      |      |                      |      |                  |      |      | Discontinued |      |  |
| ITC_SM07 | 5          |       |      |      |      |      |                      |      |                  |      |      |              |      |  |
|          | 10         |       |      |      |      |      |                      |      |                  |      |      |              |      |  |
|          | 20         |       |      |      |      |      |                      |      |                  |      |      |              |      |  |
|          | 40         |       |      |      |      |      |                      |      |                  |      |      |              |      |  |
| ITC      | 5          |       |      |      |      |      |                      |      |                  |      |      |              |      |  |

|          |    |  |  |  |  |  |  |  |  |  |  |  |  |
|----------|----|--|--|--|--|--|--|--|--|--|--|--|--|
|          | 10 |  |  |  |  |  |  |  |  |  |  |  |  |
|          | 20 |  |  |  |  |  |  |  |  |  |  |  |  |
|          | 40 |  |  |  |  |  |  |  |  |  |  |  |  |
| ITC_SM09 | 5  |  |  |  |  |  |  |  |  |  |  |  |  |
|          | 10 |  |  |  |  |  |  |  |  |  |  |  |  |
|          | 20 |  |  |  |  |  |  |  |  |  |  |  |  |
|          | 40 |  |  |  |  |  |  |  |  |  |  |  |  |
| ITC_SM10 | 5  |  |  |  |  |  |  |  |  |  |  |  |  |
|          | 10 |  |  |  |  |  |  |  |  |  |  |  |  |
|          | 20 |  |  |  |  |  |  |  |  |  |  |  |  |
|          | 40 |  |  |  |  |  |  |  |  |  |  |  |  |
|          | 80 |  |  |  |  |  |  |  |  |  |  |  |  |
| ITC_SM11 | 5  |  |  |  |  |  |  |  |  |  |  |  |  |
|          | 10 |  |  |  |  |  |  |  |  |  |  |  |  |
|          | 20 |  |  |  |  |  |  |  |  |  |  |  |  |
|          | 40 |  |  |  |  |  |  |  |  |  |  |  |  |
|          | 80 |  |  |  |  |  |  |  |  |  |  |  |  |
| ITC_SM12 | 5  |  |  |  |  |  |  |  |  |  |  |  |  |
|          | 10 |  |  |  |  |  |  |  |  |  |  |  |  |
|          | 20 |  |  |  |  |  |  |  |  |  |  |  |  |
|          | 40 |  |  |  |  |  |  |  |  |  |  |  |  |
| ITC_SM13 | 5  |  |  |  |  |  |  |  |  |  |  |  |  |
|          | 10 |  |  |  |  |  |  |  |  |  |  |  |  |
|          | 20 |  |  |  |  |  |  |  |  |  |  |  |  |
|          | 40 |  |  |  |  |  |  |  |  |  |  |  |  |
| ITC_SM14 | 5  |  |  |  |  |  |  |  |  |  |  |  |  |
|          | 10 |  |  |  |  |  |  |  |  |  |  |  |  |
|          | 20 |  |  |  |  |  |  |  |  |  |  |  |  |
|          | 40 |  |  |  |  |  |  |  |  |  |  |  |  |
|          | 80 |  |  |  |  |  |  |  |  |  |  |  |  |
| ITC_SM15 | 5  |  |  |  |  |  |  |  |  |  |  |  |  |
|          | 10 |  |  |  |  |  |  |  |  |  |  |  |  |
|          | 20 |  |  |  |  |  |  |  |  |  |  |  |  |
|          | 40 |  |  |  |  |  |  |  |  |  |  |  |  |
|          | 80 |  |  |  |  |  |  |  |  |  |  |  |  |
| ITC_SM16 | 5  |  |  |  |  |  |  |  |  |  |  |  |  |

|               |                                              |  |  |  |  |  |  |  |              |              |  |  |  |
|---------------|----------------------------------------------|--|--|--|--|--|--|--|--------------|--------------|--|--|--|
|               | 10                                           |  |  |  |  |  |  |  |              |              |  |  |  |
| ITC_SM17      | 5                                            |  |  |  |  |  |  |  |              |              |  |  |  |
|               | 10                                           |  |  |  |  |  |  |  |              |              |  |  |  |
|               | 20                                           |  |  |  |  |  |  |  |              |              |  |  |  |
|               | 40                                           |  |  |  |  |  |  |  |              |              |  |  |  |
|               | 80                                           |  |  |  |  |  |  |  |              |              |  |  |  |
| ITC_SM18      | 5                                            |  |  |  |  |  |  |  |              |              |  |  |  |
|               | 10                                           |  |  |  |  |  |  |  |              |              |  |  |  |
|               | 20                                           |  |  |  |  |  |  |  |              |              |  |  |  |
|               | 40                                           |  |  |  |  |  |  |  |              |              |  |  |  |
| ITC_SM19      | 5                                            |  |  |  |  |  |  |  |              | Discontinued |  |  |  |
|               | 10                                           |  |  |  |  |  |  |  |              |              |  |  |  |
|               | 20                                           |  |  |  |  |  |  |  |              |              |  |  |  |
|               | 40                                           |  |  |  |  |  |  |  |              |              |  |  |  |
| ITC_SM20      | 5                                            |  |  |  |  |  |  |  | Discontinued |              |  |  |  |
|               | 10                                           |  |  |  |  |  |  |  |              |              |  |  |  |
|               | 20                                           |  |  |  |  |  |  |  |              |              |  |  |  |
|               | 40                                           |  |  |  |  |  |  |  |              |              |  |  |  |
| Twenthe       | 5                                            |  |  |  |  |  |  |  |              |              |  |  |  |
|               | 10                                           |  |  |  |  |  |  |  |              |              |  |  |  |
|               | 20                                           |  |  |  |  |  |  |  |              |              |  |  |  |
|               | 40                                           |  |  |  |  |  |  |  |              |              |  |  |  |
|               | 80                                           |  |  |  |  |  |  |  |              |              |  |  |  |
| Hupsel        | 5                                            |  |  |  |  |  |  |  |              |              |  |  |  |
|               | 10                                           |  |  |  |  |  |  |  |              |              |  |  |  |
|               | 20                                           |  |  |  |  |  |  |  |              |              |  |  |  |
|               | 40                                           |  |  |  |  |  |  |  |              |              |  |  |  |
|               | 80                                           |  |  |  |  |  |  |  |              |              |  |  |  |
| <b>Legend</b> |                                              |  |  |  |  |  |  |  |              |              |  |  |  |
|               | Measurements not yet started or discontinued |  |  |  |  |  |  |  |              |              |  |  |  |
|               | EC-TM                                        |  |  |  |  |  |  |  |              |              |  |  |  |
|               | 5TM firmware 2013                            |  |  |  |  |  |  |  |              |              |  |  |  |
|               | 5TM firmware 4.0                             |  |  |  |  |  |  |  |              |              |  |  |  |



**Table S4: Change to instrumentation and measurement setups in the Twente monitoring network ordered by station.**

| <b>ITC_SM01</b> |                                       | <b>ITC_SM02</b> |                                         | <b>ITC_SM03</b> |                                        | <b>ITC_SM04</b> |                                        |
|-----------------|---------------------------------------|-----------------|-----------------------------------------|-----------------|----------------------------------------|-----------------|----------------------------------------|
| <i>Date</i>     | <i>Activity</i>                       | <i>Date</i>     | <i>Activity</i>                         | <i>Date</i>     | <i>Activity</i>                        | <i>Date</i>     | <i>Activity</i>                        |
| 29/12/2008      | Install                               | 12/11/2008      | Install                                 | 19/11/2008      | Install                                | 12/11/2008      | Install                                |
| 7/8/2014        | Change to 5TM                         | 5/6/2013        | Relocate within field                   | 27/3/2014       | Changed to 5TM                         | 9/3/2016        | Relocate within field<br>Change to 5TM |
| 9/4/2015        | Relocate within field                 | 8/4/2015        | P1: change to 5TM<br>P4: add 5TM        | 2/5/2017        | Relocate within field                  | 22/11/2019      | P3: Replace 5TM                        |
|                 |                                       | 8/7/2016        | P2: change to 5TM<br>P5: add 5TM (5 cm) |                 |                                        |                 |                                        |
|                 |                                       | 1/2/2017        | P3: change to 5TM                       |                 |                                        |                 |                                        |
|                 |                                       | 2/5/2017        | P3: replace 5TM                         |                 |                                        |                 |                                        |
| <b>ITC_SM05</b> |                                       | <b>ITC_SM06</b> |                                         | <b>ITC_SM07</b> |                                        | <b>ITC_SM08</b> |                                        |
| <i>Date</i>     | <i>Activity</i>                       | <i>Date</i>     | <i>Activity</i>                         | <i>Date</i>     | <i>Activity</i>                        | <i>Date</i>     | <i>Activity</i>                        |
| 27/5/2009       | Install                               | 19/11/2008      | Install                                 | 12/11/2008      | Install                                | 19/8/2008       | Install                                |
| 22/4/2016       | Change to 5TM                         | 23/8/2012       | Remove station                          | 26/3/2014       | Change to 5TM                          | 17/11/2009      | Reinstall                              |
| 26/4/2017       | Relocate                              | 6/6/2013        | Reinstall                               | 3/11/2015       | Relocate                               | 22/4/2016       | Change to 5TM                          |
| 2/5/2017        | Relocate                              | 17/4/2015       | Change to 5TM                           |                 |                                        |                 |                                        |
| 24/5/2018       | Relocate within field                 | 20/5/2016       | Reinstall                               |                 |                                        |                 |                                        |
|                 |                                       | 29/08/2017      | Remove station                          |                 |                                        |                 |                                        |
| <b>ITC_SM09</b> |                                       | <b>ITC_SM10</b> |                                         | <b>ITC_SM11</b> |                                        | <b>ITC_SM12</b> |                                        |
| <i>Date</i>     | <i>Activity</i>                       | <i>Date</i>     | <i>Activity</i>                         | <i>Date</i>     | <i>Activity</i>                        | <i>Date</i>     | <i>Activity</i>                        |
| 19/12/2008      | Install                               | 12/12/2008      | Install                                 | 12/12/2008      | Install                                | 27/5/2009       | Install                                |
| 2/5/2013        | P2: Replace EC-TM                     | 2/5/2013        | Remove                                  | 11/5/2012       | Relocate within field                  | 2/5/2013        | Relocate within field                  |
| 20/12/2013      | Change to 5TM                         | 2/5/2014        | Reinstall                               | 9/10/2015       | Relocate within field<br>Change to 5TM | 16/4/2015       | Change to 5TM                          |
| 21/12/2015      | P2: replace 5TM<br>P5: add 5TM (5 cm) | 08/04/2015      | Remove                                  | 29/6/2016       | Remove                                 | 30/6/2016       | P5: add 5TM (5 cm)                     |
| 7/11/2018       | P2: replace 5TM                       | 20/5/2016       | Reinstall (5TM)                         | 18/10/2016      | Reinstall                              |                 |                                        |
| <b>ITC_SM13</b> |                                       | <b>ITC_SM14</b> |                                         | <b>ITC_SM15</b> |                                        | <b>ITC_SM16</b> |                                        |
| <i>Date</i>     | <i>Activity</i>                       | <i>Date</i>     | <i>Activity</i>                         | <i>Date</i>     | <i>Activity</i>                        | <i>Date</i>     | <i>Activity</i>                        |
| 3/6/2009        | Install                               | 3/6/2009        | Install                                 | 19/11/2008      | Install                                | 1/4/2009        | Install                                |
| 24/4/2014       | Change to 5TM                         | 24/11/2010      | Remove                                  | 7/3/2016        | Relocate within field                  | 26/5/2011       | Remove                                 |

|                 |                       |                 |                    |                 |                   |                 |                       |
|-----------------|-----------------------|-----------------|--------------------|-----------------|-------------------|-----------------|-----------------------|
|                 |                       |                 |                    |                 | P4 & P5: add 5TM  |                 |                       |
| 8/3/2016        | P5: add 5TM (10 cm)   | 20/4/2011       | Reinstall          | 22/11/2019      | P2: change to 5TM | 22/8/2012       | Relocate within field |
| 20/9/2017       | P3: replace 5TM       | 6/4/2013        | P1: Replace sensor |                 |                   | 25/4/2014       | Change to 5TM         |
|                 |                       | 7/11/2014       | Change to 5TM      |                 |                   | 20/9/2017       | Reinstall             |
|                 |                       | 1/4/2016        | Relocate           |                 |                   | 7/11/2018       | P2: replace 5TM       |
|                 |                       | 1/2/2017        | P2: Replace 5TM    |                 |                   |                 |                       |
| <b>ITC_SM17</b> |                       | <b>ITC_SM18</b> |                    | <b>ITC_SM19</b> |                   | <b>ITC_SM20</b> |                       |
| <i>Date</i>     | <i>Activity</i>       | <i>Date</i>     | <i>Activity</i>    | <i>Date</i>     | <i>Activity</i>   | <i>Date</i>     | <i>Activity</i>       |
| 1/4/2009        | Install               | 1/4/2009        | Install            | 3/6/2009        | Install           | 11/9/2009       | Install               |
| 20/4/2011       | Relocate within field | 25/4/2014       | P3: replace EC-TM  | 2/5/2014        | Change to 5TM     | 2/5/2014        | Change to 5TM         |
| 17/4/2015       | Change to 5TM         | 17/4/2015       | Change to 5TM      | 20/9/2017       | Remove            | 1/2017          | Remove                |
| 1/4/2016        | Relocate              | 29/4/2020       | P2: replace 5TM    |                 |                   |                 |                       |
|                 |                       |                 |                    |                 |                   |                 |                       |
|                 |                       |                 |                    |                 |                   |                 |                       |
| <b>Hupsel</b>   |                       | <b>Twenthe</b>  |                    |                 |                   |                 |                       |
| <i>Date</i>     | <i>Activity</i>       | <i>Date</i>     | <i>Activity</i>    |                 |                   |                 |                       |
| 20/12/2017      | Install               | 20/12/2017      | Install            |                 |                   |                 |                       |
|                 |                       | 9/11/2018       | P2: replace 5TM    |                 |                   |                 |                       |
